# 1 Lung evolution in vertebrates and the water-to-land transition

2 Camila Cupello<sup>1\*</sup>, Tatsuya Hirasawa<sup>2</sup>, Norifumi Tatsumi<sup>3</sup>, Yoshitaka Yabumoto<sup>4</sup>, Pierre  
3 Gueriau<sup>5,6</sup>, Sumio Isogai<sup>7</sup>, Ryoko Matsumoto<sup>8</sup>, Toshiro Saruwatari<sup>9,10</sup>, Andrew King<sup>11</sup>,  
4 Masato Hoshino<sup>12</sup>, Kentaro Uesugi<sup>12</sup>, Masataka Okabe<sup>3</sup>, Paulo M. Brito<sup>1\*</sup>  
5

6

7 <sup>1</sup>Departamento de Zoologia-IBRAG, Universidade do Estado do Rio de Janeiro, R. São Francisco Xavier,  
8 524-Maracanã, Rio de Janeiro 20550-900, Brazil. [camila.dc@gmail.com](mailto:camila.dc@gmail.com); [pbritopaleo@yahoo.com.br](mailto:pbritopaleo@yahoo.com.br)

9 <sup>2</sup>Department of Earth and Planetary Science, Graduate School of Science, The University of Tokyo 7-3-1  
10 Hongo, Bunkyo-ku, Tokyo 113-0033, Japan. [hirasawa@eps.s.u-tokyo.ac.jp](mailto:hirasawa@eps.s.u-tokyo.ac.jp)

11 <sup>3</sup>Department of Anatomy, The Jikei University School of Medicine, 3-25-8 Nishi-Shimbashi, Minato-ku,  
12 Tokyo 105-8461, Japan. [noratt2008@gmail.com](mailto:noratt2008@gmail.com); [maokabe@jikei.ac.jp](mailto:maokabe@jikei.ac.jp)

13 <sup>4</sup>Kitakyushu Museum of Natural History and Human History, 2-4-1 Higashida, Yahatahigashi-ku,  
14 Kitakyushu, Fukuoka 805-0071, Japan. [yabumoto@kmnh.jp](mailto:yabumoto@kmnh.jp)

15 <sup>5</sup>Institute of Earth Sciences, University of Lausanne, Géopolis, 1015 Lausanne, Switzerland.

16 [pierre.gueriau@hotmail.fr](mailto:pierre.gueriau@hotmail.fr)

17 <sup>6</sup>Université Paris-Saclay, CNRS, ministère de la Culture, UVSQ, MNHN, Institut photonique d'analyse  
18 non-destructive européen des matériaux anciens, 91192 Saint-Aubin, France.

19 <sup>7</sup>Department of Anatomy, Iwate Medical University School of Medicine, Morioka, Iwate, Japan.  
20 [sumio\\_isogai@yahoo.co.jp](mailto:sumio_isogai@yahoo.co.jp)

21 <sup>8</sup>Kanagawa Prefectural Museum of Natural History, 499, Iryuda, Odawara, Kanagawa, 250-0031, Japan.  
22 [ryokosaur@gmail.com](mailto:ryokosaur@gmail.com)

23 <sup>9</sup>Atmosphere and Ocean Research Institute, The University of Tokyo, Chiba, Japan. [tsaruwat@aori.u-tokyo.ac.jp](mailto:tsaruwat@aori.u-tokyo.ac.jp)

24 <sup>10</sup>Seikei Education and Research Center for Sustainable Development, Tokyo, Japan.

25 <sup>11</sup>Synchrotron SOLEIL, L'orme des Merisiers Saint-Aubin, BP48, F-91192, Gif-sur-Yvette Cedex, France.  
26 [king@synchrotron-soleil.fr](mailto:king@synchrotron-soleil.fr)

27 <sup>12</sup>Japan Synchrotron Radiation Research Institute (JASRI/SPring-8), 1-1-1 Kouto, Sayo, Hyogo 679-5198,  
28 Japan. [hoshino@spring8.or.jp](mailto:hoshino@spring8.or.jp); [ueken@spring8.or.jp](mailto:ueken@spring8.or.jp)

29

30 \*Corresponding authors. Email: [camila.dc@gmail.com](mailto:camila.dc@gmail.com); [pbritopaleo@yahoo.com.br](mailto:pbritopaleo@yahoo.com.br)  
31  
32

33

## 34 Abstract

35 A crucial evolutionary change in vertebrate history was the Palaeozoic (Devonian ~400  
36 million years ago) water-to-land transition, allowed by key morphological and  
37 physiological modifications including the acquisition of lungs. Nonetheless, the origin and  
38 early evolution of vertebrate lungs remain highly controversial, particularly whether the  
39 ancestral state was paired or unpaired. Due to the rarity of fossil soft tissue preservation,  
40 lung evolution can only be traced based on the extant phylogenetic bracket. Here we  
41 investigate, for the first time, lung morphology in extensive developmental series of key

42 living lunged osteichthyans using synchrotron X-ray microtomography and histology. Our  
43 results shed light on the primitive state of vertebrate lungs as unpaired, evolving to be  
44 truly paired in the lineage towards the tetrapods. The water-to-land transition confronted  
45 profound physiological challenges and paired lungs were decisive for increasing the  
46 surface area and the pulmonary compliance and volume, especially during the air-  
47 breathing on land.

## 50 **Introduction**

51 Lungs, the most important organ of the pulmonary complex, are rarely preserved in  
52 fossils, hindering direct evidence of how the earliest air-breathing vertebrates breathed air.  
53 So far, the evolutionary origin of the vertebrate lung has been narrowed down to the basal  
54 osteichthyans (Goujet, 2011; Tatsumi et al., 2016). However, since the knowledge about  
55 morphological and genetic development of the lung has been highly biased in amniotes,  
56 the original form of this evolutionary novelty has remained elusive. One hypothesis,  
57 formed and supported by studies on tetrapods (particularly mammals and birds), assumes  
58 that the lung evolved through a modification of the pharyngeal pouch (Kastschenko, 1887),  
59 as the lung bud develops at the pharyngo-oesophageal junction during embryonic  
60 development. Consequently, this view (Kastschenko, 1887; Kuratani and Tanaka, 1990)  
61 predicts that the primitive lungs appeared as bilaterally paired organs at the caudolateral  
62 part of the pharynx. Indeed, in embryology, lungs of living tetrapods have been mostly  
63 described as paired derivatives of the respiratory tube, arisen from paired and small hollow  
64 swellings (Marshall Flint, 1990). Previous studies on amphibians have also proposed that  
65 the lung bud develop from paired rudiments of the ventral portions of the eighth  
66 pharyngeal pouches (Goodrich, 1931; Marcus, 1937; Perry et al., 2001). Additionally, the

67 plesiomorphic state of lungs has been mostly described as paired organs (Funk, Lencer  
68 and McCune, 2020). On the other hand, another hypothesis does not constrain the  
69 evolutionary origin of the lung to the serial homologue of the pharyngeal pouch (Greil,  
70 1913; Neumayer, 1930; Wassnetzov, 1932). In this view, although the possibility that the  
71 primitive lung developed on the pharyngeal endoderm is not excluded, the primitive lung  
72 is considered to appear on the floor of the pharynx, or more generally, on the floor of the  
73 foregut. This scenario does not predict bilaterally paired forms of primitive lungs.

74 Curiously, some living vertebrates display an unpaired organ (Cupello et al., 2015;  
75 Cupello et al., 2017a; Cupello et al., 2017b; Cupello, Clément and Brito, 2019; Lambertz  
76 and Perry, 2015; Lambertz et al., 2015), leaving the ancestral condition equivocal. The  
77 sister group to all other extant actinopterygians, the obligate air-breathing polypterids  
78 (Icardo et al., 2017), breath air using lungs, which have previously been described as a  
79 paired organ (Icardo et al., 2017; Geoffrey Saint Hilaire, 1802; Graham, 1997). However,  
80 in adult specimens of *Polypterus senegalus* the glottis only opens to the right sac and the  
81 left sac is connected to the right sac by a separate opening (Graham, 1997), raising old  
82 questions about its true paired condition. Among sarcopterygians, the unpaired lung of  
83 coelacanth is unequivocal. The living coelacanth *Latimeria chalumnae*, that inhabits  
84 moderate deep-water and makes gas exchanges only through gills, have an unpaired lung  
85 with no outline of a second bud at different developmental stages (Cupello et al., 2015;  
86 Cupello et al., 2017a; Cupello, Clément and Brito, 2019). In the extant sister group of all  
87 tetrapods (Amemiya et al., 2013), namely lungfishes, the three extant genera have lungs  
88 capable to uptake oxygen from the air. However, in the most basal one, the facultative air-  
89 breather *Neoceratodus forsteri*, the lung is described as unpaired (Greil, 1913; Graham,  
90 1997; Grigg, 1965). In contrast with both South American and African lungfishes, the

91 Lepidosirenoidea, that are obligated air-breathers and have a lung described as a ventral  
92 paired organ (16) like tetrapod lungs.

93 To follow lung evolutionary history in vertebrates, we analyzed primitive sequence  
94 of morphogenesis of lungs of key living osteichthyans (Figs. 1–6). Embryos, larvae,  
95 juveniles and adults of *P. senegalus*, *N. forsteri*, *Lepidosiren paradoxa* were examined. To  
96 compare the lung anatomy of osteichthyan fishes with tetrapods, we studied also an  
97 extensive developmental series of the living salamandrid *Salamandra salamandra*, from  
98 early and late larvae to juveniles before and after metamorphosis (Fig. 5). As salamanders  
99 are often considered to have retained plesiomorphic characteristics of tetrapod stance and  
100 locomotion (Pierce et al., 2020), we used them here also as a model for understanding lung  
101 evolution in tetrapods. Specimens of mentioned taxa were examined through x-ray  
102 microtomography, the unique effective non-invasive methodology to study their  
103 morphology and histology at a three-dimensional (sub) microscale. When possible, we  
104 proceeded also with dissections and the study of histological sections. We compare our  
105 results with the available information from the lung of fossil taxa, the coelacanth and  
106 salamanders (Cupello, Clément and Brito, 2019; Brito et al., 2010; Tissier, Rage and  
107 Laurin, 2017).

## 110 **Results**

### 111 **The lung development in *Polypterus senegalus***

112 From our observations on embryos of 8.0, 8.5, 9.1 and 9.3 mm TL (total length), the lung  
113 anlage develops as a ventral unpaired and tubular depression of the respiratory pharynx  
114 (the posterior portion of the pharynx), surrounded by undifferentiated mesenchymal cells<sup>6</sup>  
115 (Fig. 1A, B, Fig. 2B, C). Only at the 12 mm TL larva, the left bud arises from the principal

116 and primary lung anlage as a branch (Fig. 2D). Subsequently, the lung assumes its  
117 asymmetrical morphology, the left sac is smaller and remains ventral in the abdominal  
118 cavity, while the right one (principal tube) starts a partial turn up and stays parallel to the  
119 dorsal portion of the foregut (including the stomach). The left sac keeps a secondary  
120 connection to a lateral opening of the principal tube, and not to the foregut (Fig. 1 D, E,  
121 Fig. 6 A, B, Fig. S1, Fig. S2). Undifferentiated dense cells surrounding the glottis are  
122 visible for the first time in specimens of 15.5 mm TL (black arrows in Fig. 2E). Air-  
123 breathing behavior starts at the juvenile stage in *P. senegalus* (2), and from juveniles of 23  
124 mm TL onward, the blastema starts to develop into the muscular sphincter and respiratory  
125 epithelium at the glottis (ciliated cells intercalated by goblet cells). Right and left sacs are  
126 well developed and have a projection anterior to the connection with the small pneumatic  
127 duct in juveniles (Fig. 1D, E). The right tube is three times longer than the left one, with  
128 an expanded diameter in its caudal portion, posterior to the stomach (Fig. 1C, D).

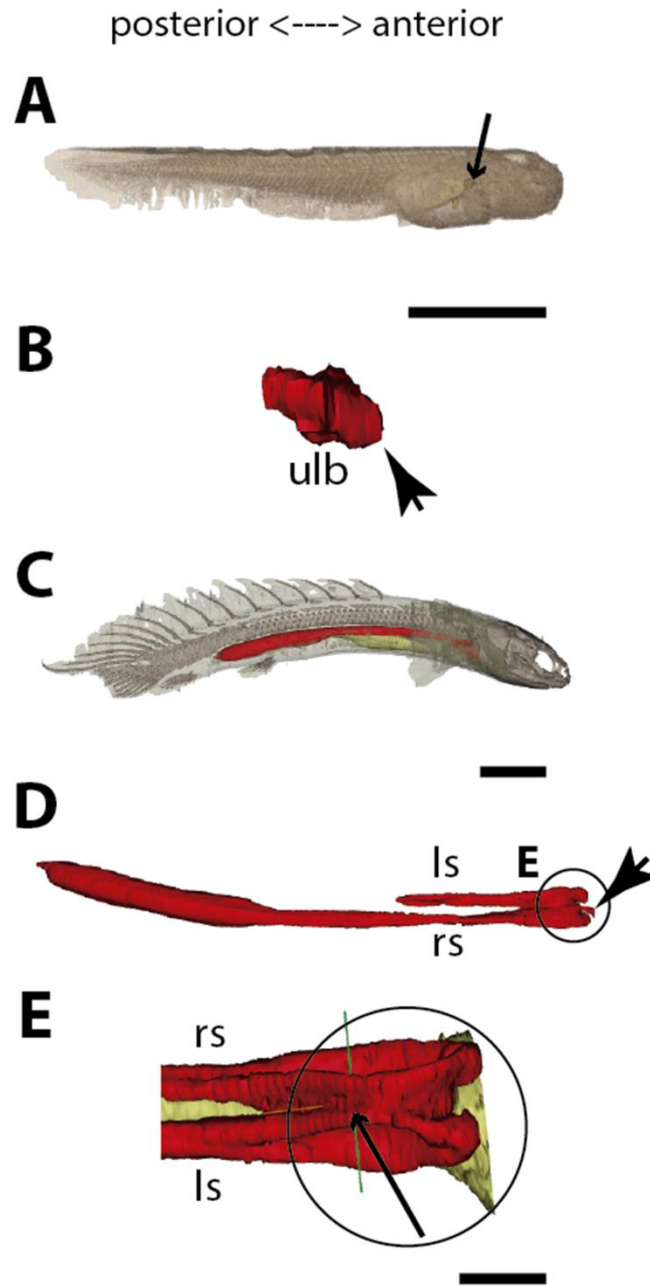

**Fig. 1. Three-dimensional reconstructions of the pulmonary complex of *Polypterus senegalus*.** (A) Early embryo (9.3 mm TL) in right lateral view, (B) Isolated lung of the early embryo in dorsal view, (C) Juvenile (45 mm TL) in right lateral view, (D) Isolated lung of the juvenile in dorsal view, (E) Close-up of (D) highlighting the lung in ventral view and pointing out the region of the independent and secondary connection of the left sac to the right one by a lateral opening. Yellow, foregut including the stomach; red, lung. Black arrow in (A) pointing to the lung. Arrowheads in (B) pointing to the lung connection to the foregut and in (D) pointing to the pneumatic duct connection to the foregut. Black arrow in (E) pointing to the independent connection. Ls, left sac; rs, right sac; ulb, unpaired lung bud. Scale bars, 5.0 mm (A); 0.075 mm (B); 5.0 mm (C, D); 1.0 mm (E).

129  
130  
131  
132  
133  
134  
135  
136  
137  
138  
139  
140  
141

142           The right and left sacs make a partial turn-up, remaining parallel to the dorsal  
143           surface of the upper gastrointestinal tract (one of each side). *Polypterus senegalus* lung is  
144           internally smooth and lacks alveolation at all the examined developmental stages, except  
145           for in the 45 mm TL juvenile, in which the most anterior projection of the lung, anterior to  
146           the connection with the pneumatic duct, is slightly compartmentalized. This evidence  
147           based on the first developmental stages of *P. senegalus* (embryos with 8.5 mm, 9.1 mm,  
148           9.3 mm) lung prove that the lung bud initially develops as an unpaired anlage in this taxon  
149           (Fig. 1B, Fig. 2 B, C). The left sac develops secondarily from the right sac at later  
150           developmental stages, as a diverticulum, or a lobe, of the right primary lung (Fig. 2 E, F,  
151           Fig. S1, Fig. S2).

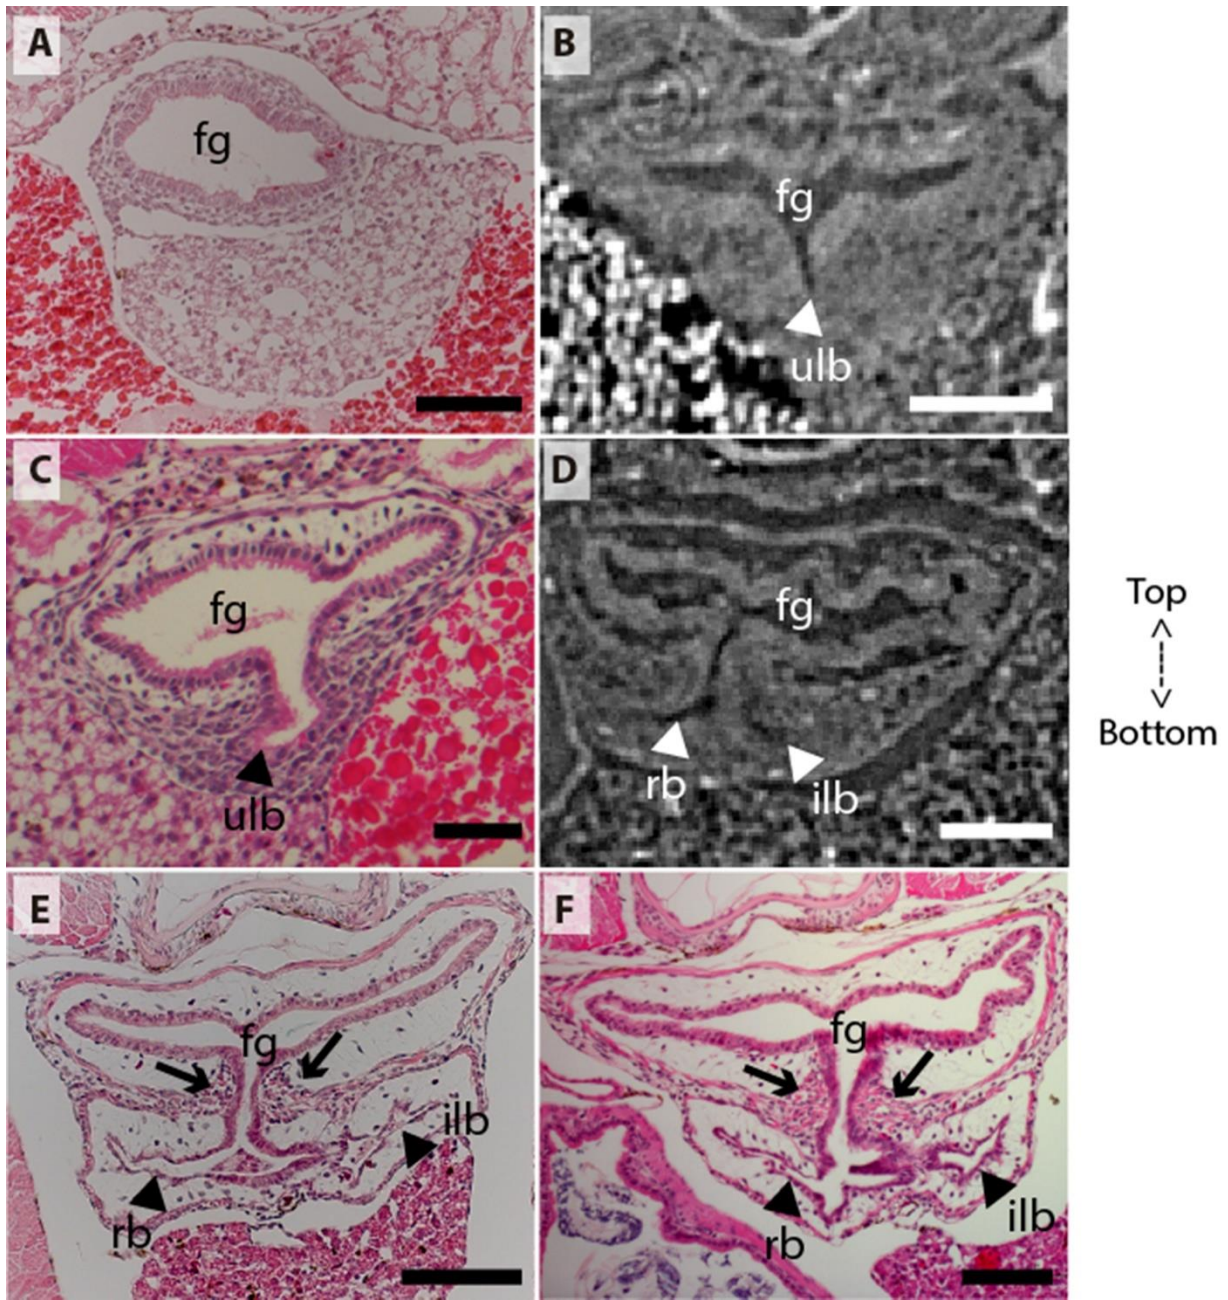

**Fig. 2. Coronal sections of the unpaired lung in the living actinopterygian fish *Polypterus senegalus*.** (A) No lung bud in 8.0 mm TL specimen, (B) Origin of an unpaired lung bud in 8.5 mm TL specimen, (C) Unpaired lung bud in 9.1 mm TL specimen, (D) First register of an independent and lateral second lung bud in 12 mm TL specimen, (E, F) Independent and lateral second lung bud arising from the principal tube in 15.5 mm TL and 18 mm TL specimens. (A, C, E–F) Histological thin-sections. (B, D) Sections of synchrotron X-ray microtomography of the early embryo. Black and white head arrows pointing to the lumen of the unpaired lung buds; arrows pointing to the undifferentiated cells surrounding the glottis. Fg, foregut; ilb, independent lateral bud; rb, right bud; ulb, unpaired lung bud. Scale bars, 0.2 mm (A, E); 0.1 mm (B, D, F); 0.05 mm (C).

152

153

154

155

156

157

158

159

160

161

162

163

164

165



166 **The lung development in *Latimeria chalumnae***

167 Embryos of *L. chalumnae* display ventral compartmentalized unpaired lung throughout its  
168 length, suggesting alveolation (7), and in the early embryo (40 mm TL) a lateral and  
169 internal chamber is also present (Fig. 3; Fig. 6 D). At the latest developmental stages the  
170 pulmonary complex shows vestigial features, and no internal compartmentalization is  
171 recognizable (Lambertz and Perry, 2015). Adult specimens have constrictions and  
172 septations that divide the unpaired lung into separate lobes throughout its length, as in  
173 some fossil coelacanth (Cupello, Clément and Brito, 2019). Fossil coelacanth, from late  
174 Devonian to late Cretaceous, were most probably facultative air-breathers and made gas  
175 exchanges through their unpaired lungs and gills (Cupello, Clément and Brito, 2019; Brito  
176 et al., 2010). Although some authors suggest that *L. chalumnae* fatty organ evidences a  
177 paired lung, previous studies proved that this organ is not the second lung, since there is  
178 no opened connection between this organ and the foregut or lung, nor lung plates  
179 surrounding it (Cupello et al., 2015; Cupello et al., 2017a; Cupello et al., 2017b). Based on  
180 these, the paired condition of coelacanth lungs can be excluded.

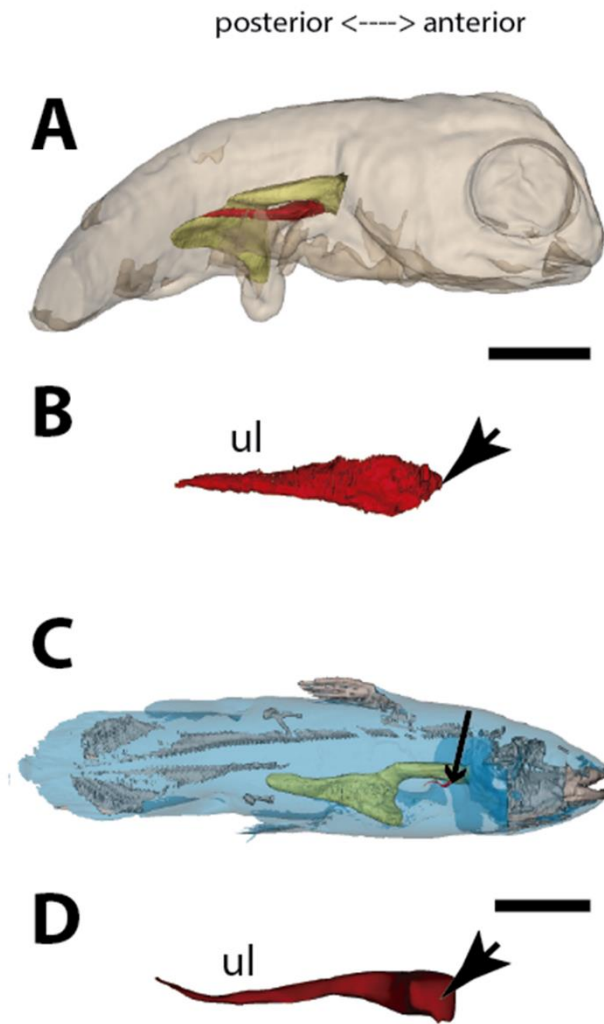

181  
182 **Fig. 3. Three-dimensional reconstructions of the pulmonary complex of *Latimeria***  
183 ***chalumnae*.** (A) Early embryo of *Latimeria chalumnae* (45 mm TL) in right lateral  
184 view (Cupello et al., 2015), (B) Isolated unpaired lung of the early embryo in  
185 dorsal view, (C) Adult specimen of *Latimeria chalumnae* (1300 mm TL) in right  
186 lateral view (Cupello et al., 2015), (D) Isolated unpaired lung of the adult  
187 specimen in dorsal view. Yellow, foregut including the stomach; red, lung.  
188 Arrowheads in (B) and (D) pointing to the lung connection to the foregut. Black  
189 arrow in (C) pointing to the lung. Ul, unpaired lung bud in (B) and unpaired lung  
190 in (D). Scale bars, 5.0 mm (A); 5.0 mm (B); 200.0 mm (C); 40 mm (D). Modified  
191 from Cupello et al., 2015.  
192

### 193 **The lung development in *Neoceratodus forsteri***

194 The first developmental stage with lung anlage registered in this study is an early larva of  
195 13.5 mm TL, with an unpaired morphology represented primarily by lung anterior  
196 projection (Fig. 4 B). In larvae of 16 mm, 17 mm, and 17.5 mm TL, although

197 organogenesis is still not complete, a long and unpaired lung anlage is clearly identifiable  
198 and arises as a ventral depression of the post-pharyngeal foregut (Fig. 6 E, F). In the 19  
199 mm TL specimen, the unpaired lung starts its dorsal turn up in relation to the dorsal  
200 portion of the foregut (including the stomach) (Fig. S3). From 20.5 mm TL onward,  
201 organogenesis is completed. In the larva of 20.5 mm TL, the lung remains unpaired and is  
202 ventrally connected to the post-pharyngeal foregut by a ventral, opened and long  
203 pneumatic duct. This organ has a projection anterior to the connection of the pneumatic  
204 duct and does not display alveolation/compartmentalization yet. According to previous  
205 studies (Kemp, 1982, 1986), air-breathing begins in *N. forsteri* at 25mm TL larval stage.  
206 Our results reveal that the larva with 26.5 mm TL presents a lung wall slightly pleated.  
207 From 50 mm TL larval stage onward, the lung wall is pleated eventually providing a high  
208 degree of alveolation. In the adult individual with 200 mm TL, the single lung displays  
209 internally two lateral chambers that are connected to a principal median chamber at both  
210 sides as a single structure (Fig. 4 C–E). In adult specimens of *N. forsteri*, the lung is highly  
211 compartmentalized by septa of smooth muscle and non-elastic connective tissue, as well as  
212 spongy alveolar structures (Grigg, 1965). At this developmental stage, the lung makes a  
213 complete dorsal turn-up at its posterior portion in relation to the gastrointestinal tract (Fig.  
214 4 C). Although some authors pointed the presence of a second bud at the early  
215 developmental stages of *N. forsteri*, referred as the left lung (Spencer, 1893; Neumayer,  
216 1904), the results presented herein show an indubitably unpaired configuration for  
217 *Neoceratodus* lung throughout the ontogeny (Fig. 4 A–E, Fig. 6 E, F, Fig. S3).

### 218 219 **The lung development in *Lepidosiren paradoxa***

220 Lungs of the four specimens studied herein, from larva to adults (larva with 46 mm TL,  
221 juveniles with 68 mm TL and 222.1 mm TL, and adult with 400 mm TL), display a similar

222 morphology and, surprisingly, left and right tubes do not arise simultaneously. Only the  
223 right sac is connected to the pharynx by a long pneumatic duct (Fig. 6 G, H, Fig. S4). The  
224 left sac is a branch of the right one, connected by a posterior and secondary opening at the  
225 lung level, already in dorsal position in relation to the foregut (Fig. 6 G, H, Fig. S4). There  
226 is no connection of the left sac with the pneumatic duct. In *L. paradoxa*, only the  
227 pneumatic duct is ventrally positioned, and the lung makes a complete dorsal turn up from  
228 the right side of the upper gastrointestinal tract (Fig. 4 F–K, Fig. S5), just after the ventral  
229 connection to the pharynx. This complete dorsal turn-up is also seen in the lung of adult  
230 specimens of *N. forsteri* (Fig. 4 I–K). There are no anterior projections of the lung. Lung  
231 compartmentalization is clearly observable through dissections, evidencing the high  
232 degree of alveolation (Fig. S5). Our results indicate that the lung of *L. paradoxa* is, in fact,  
233 remarkably similar to *P. senegalus* lung. The so-called left lung of *L. paradoxa* is most  
234 likely a diverticulum or a modified lateral lobe, which had evolved secondarily, an  
235 advantage for enlarging the surface area for oxygen-uptake, eventually enabling the  
236 obligatory air-breathing performance in the lineage towards *L. paradoxa*.

222  
223  
224  
225  
226  
227  
228  
229  
230  
231  
232  
233  
234  
235  
236  
237

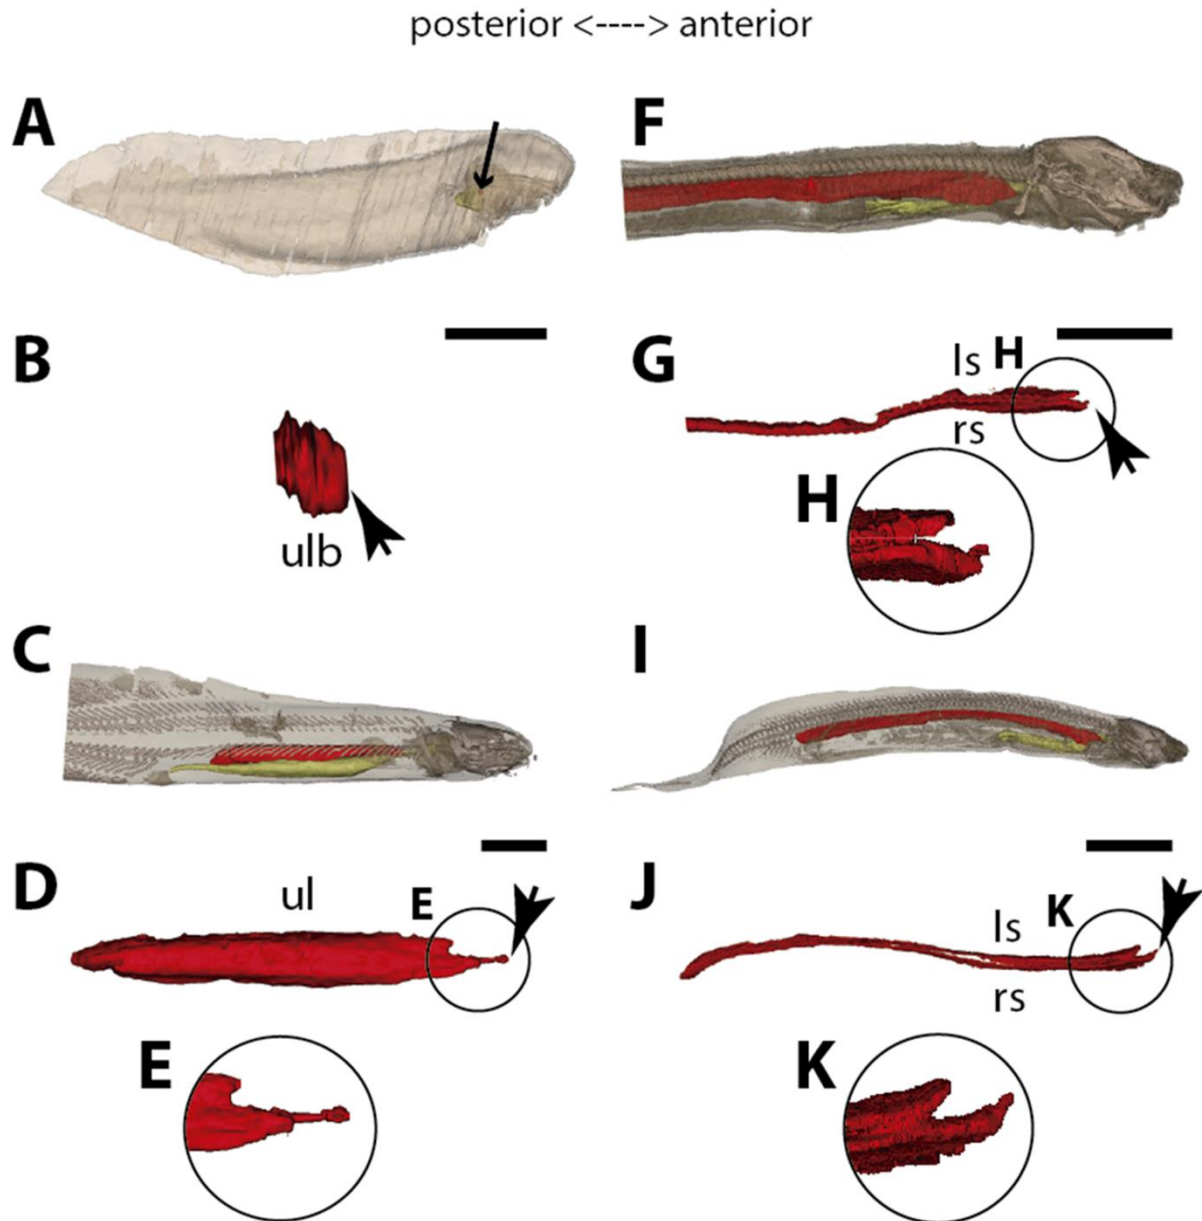

**Fig. 4. Three-dimensional reconstructions of the pulmonary complex of two species of Lepidosirenoidea.** (A) Early embryo of *Neoceratodus forsteri* (13.5 mm TL) in right lateral view, (B) Isolated unpaired lung of the early embryo in dorsal view, (C) Adult specimen of *Neoceratodus forsteri* (200 mm TL) in right lateral view, (D) Isolated unpaired lung of the adult specimen in dorsal view, (E) Close-up of the lung unpaired connection to the foregut in (D), (F) Larva of *Lepidosiren paradoxa* (46 mm TL) in lateral view, (G) Isolated lung of the larval specimen in dorsal view, (H) Close-up of the lung unpaired connection to the foregut in (H), (I) Juvenile of *Lepidosiren paradoxa* young adult (68 mm TL) in lateral view, (J) Isolated lung of the juvenile specimen in dorsal view, (K) Close-up of the lung unpaired connection to the foregut in (J). Yellow, foregut including the stomach; red, lung. Black arrow in (A) pointing to the lung. Arrowheads in (B), pointing to the lung connection to the foregut and in (D), (G) and (J) pointing the pneumatic duct connection to the foregut. Ls, left sac; rs, right sac; ul, unpaired lung; ulb,

238  
239  
240  
241  
242  
243  
244  
245  
246  
247  
248  
249  
250  
251  
252  
253

254 unpaired lung bud. Scale bars, 2.5 mm (A); 0.1 mm (B); 20 mm (C); 10 mm (D, I,  
255 J); 5.0 mm (F, G).  
256

### 257 **The lung development in *Salamandra salamandra***

258 In early larvae with 35.5 mm TL and 42.8 mm TL, paired lungs are collapsed in its middle  
259 and posterior portion (Fig. 5 A, B). The internal lung wall is thin and smooth, without  
260 compartmentalization and/or alveolation in its inner wall (Fig. 6 J, Fig. S6). From the early  
261 larvae onward, the muscular glottis develops on the ventral portion of the pharynx, and  
262 both left and right lungs arise simultaneously and symmetrically from a long trachea and  
263 paired first order bronchioles (Fig. 5 C, D, Fig. 6 I, J, Fig. S6). Lungs are symmetrical in  
264 size and morphology and are placed in the anteriormost portion of the abdominal cavity, as  
265 described for other tetrapods (Fig. 5 C, D).

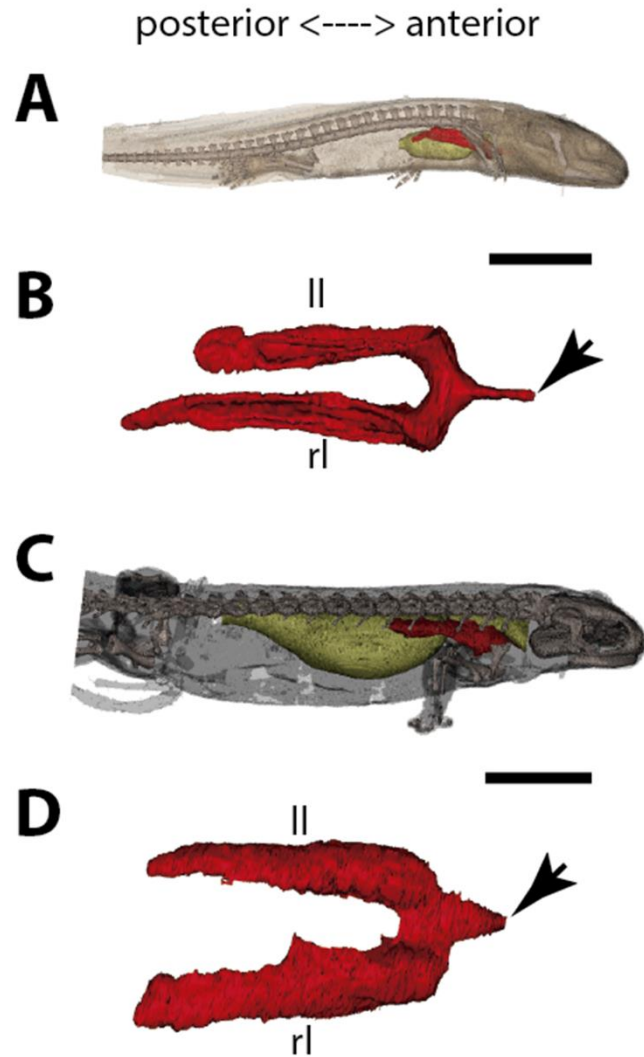

**Fig. 5. Three-dimensional reconstructions of the pulmonary complex of *Salamandra salamandra*.** (A) Early larva of *Salamandra salamandra* (35.5 mm TL) in right lateral view, (B) Isolated paired lung of the larva embryo in dorsal view, (C) Juvenile of *Salamandra salamandra* (81.85 mm TL) in right lateral view, (D) Isolated unpaired lung of the juvenile specimen in dorsal view. Yellow, foregut including the stomach; red, lung. Arrowheads in (B) and (D) pointing to the trachea connection to the foregut. Ll, left lung; rl, right lung. Scale bars, 5.0 mm (A); 3.125 mm (B); 10 mm (C); 6.25 cm (D).

In postmetamorphic juveniles (of 81.85 mm TL), paired lungs are already functional, not collapsed, and the main organ for oxygen-uptake (Goniakowska-Witalińska, 1978, 1982). From this developmental stage onward, lungs are highly compartmentalized by multiple septa. Due to the paired and compartmentalized anatomy, the lung surface area for

281 oxygen-uptake, as well as its volume capacity, increase substantially – both important  
282 features for a functional lung in dry environments. Here we confirm that at different  
283 developmental stages of *S. salamandra*, lungs are truly paired since both left and right  
284 lungs arise simultaneously and symmetrically and are directly connected to the trachea.  
285 Throughout the ontogeny, *S. salamandra* lungs have a ventral origin, and makes a partial  
286 dorsal turn-up in its posterior portion, remaining parallel to the dorsal wall of the upper  
287 gastrointestinal tract. Due to the rarity of soft tissue preservation in the fossil record, only  
288 one species of salamandrid, *Phosphotriton sigei* presents its lung preserved (Tissier, Rage  
289 and Laurin, 2017). This lung is described as multichambered, placed in the anteriormost  
290 part of the abdominal cavity (Tissier, Rage and Laurin, 2017), such as in the living  
291 salamandrid described above.



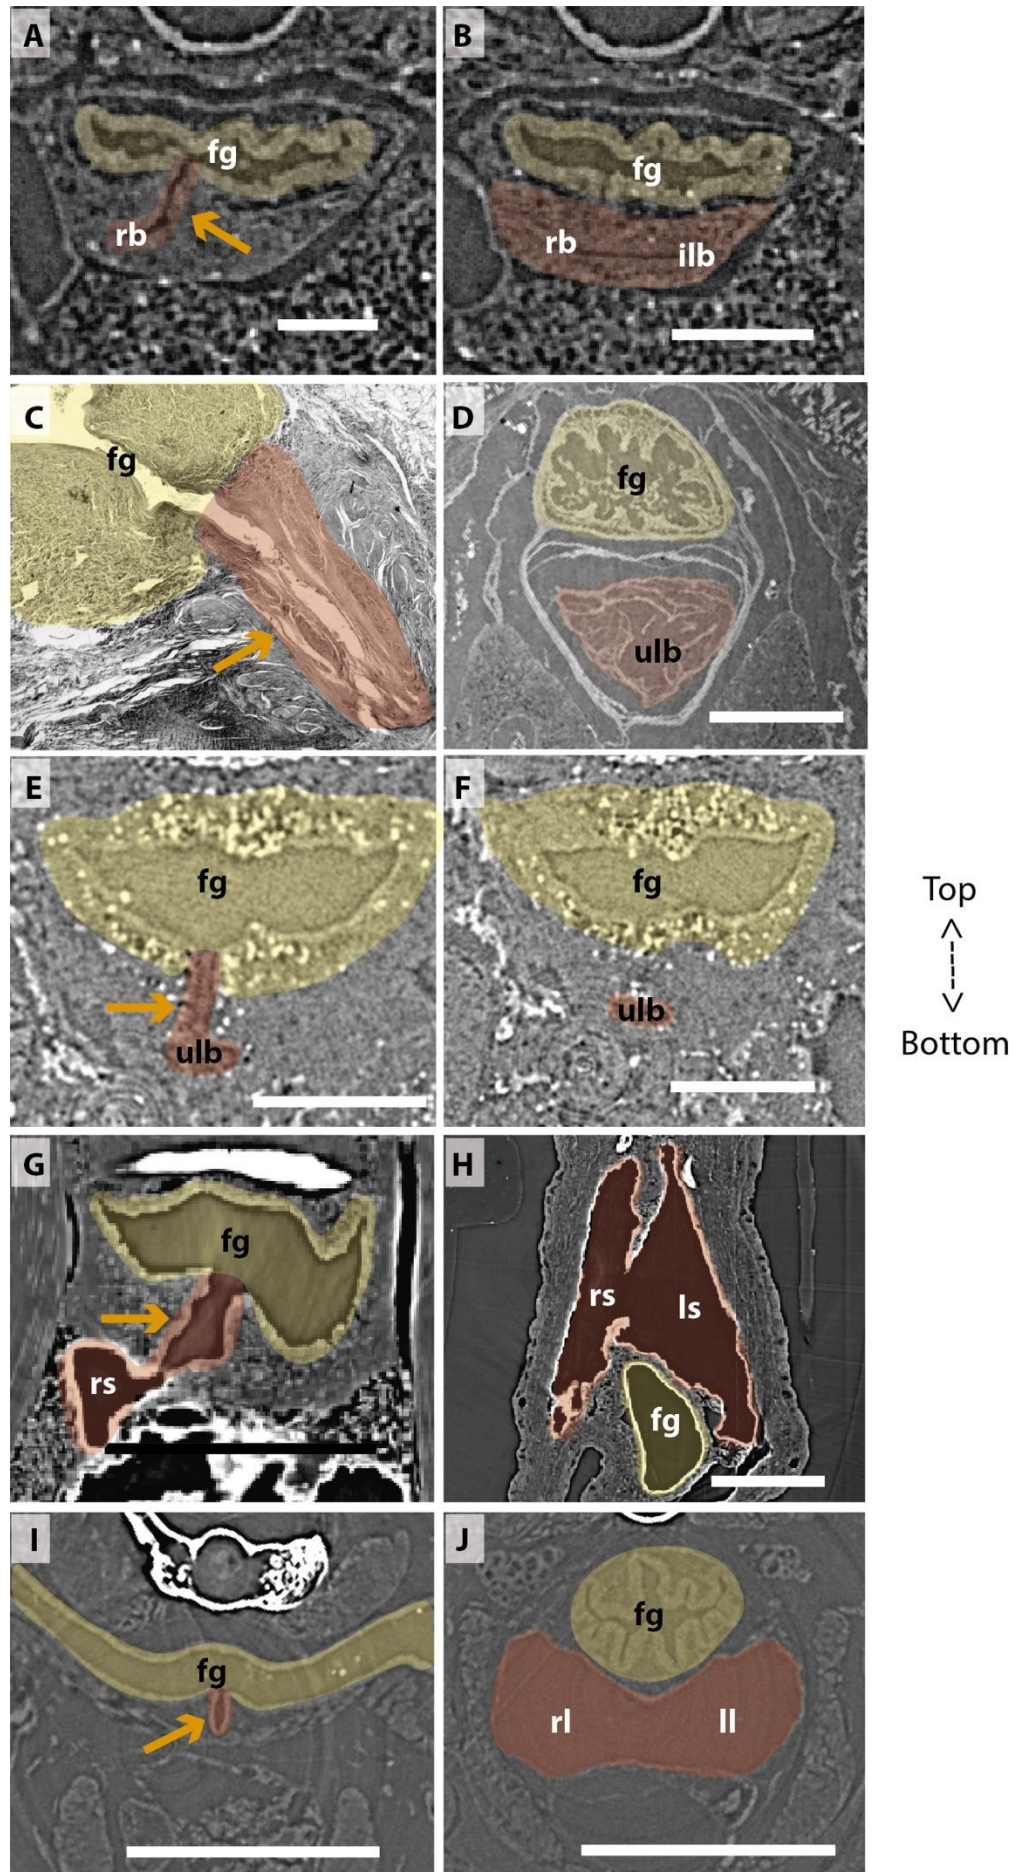

293

294 **Fig. 6. Comparison of sections showing the difference in lung origin and connection**  
295 **between unpaired (A-H) and true paired lungs (I, J).** (A, B) Virtual section of  
296 *Polypterus senegalus* (12 mm TL), (C) Histological thin section of *Latimeria*  
297 *chalumnae* (127 cm) (Cupello et al., 2017a), (D) Virtual section of *Latimeria*  
298 *chalumnae* (40 mm TL) (modified from Cupello et al., 2017a), (E, F) Virtual  
299 section of *Neoceratodus forsteri* (16 mm TL), (G, H) Virtual section of *Lepidosiren*  
300 *paradoxa* (46 mm TL), (I, J) Virtual section of *Salamandra salamandra* (35.5 mm  
301 TL). Yellow, foregut including the stomach; red, lung. Orange arrows, opened  
302 connection between the foregut and the lung. Fg, foregut; ll, left lung; ls, left sac;  
303 rb, right bud; ilb, independent lung bud; rl, right lung; rs, right sac; ulb, unpaired  
304 lung bud. Scale bars, 0.25 mm (A, B); 3.0 mm (C); 1.0 mm (D); 0.1 mm (E, F);  
305 0.5 mm (G, H); 1.25 mm (I, J).  
306

307

## 308 Discussion

309 Traditionally, vertebrate lungs are defined as ventral paired organs derived from the  
310 ventral portion of the posterior pharynx or post-pharyngeal foregut (Perry et al., 2001;  
311 Funk, Lencer and McCune, 2020; Lambertz and Perry, 2015; Graham, 1997; Kardong,  
312 2015). However, we demonstrate here the presence of an unambiguous unpaired lung, that  
313 develop from the ventral foregut, but sometimes occupy the dorsal position later in the  
314 development of osteichthyan fishes (Fig. 7). Based on extensive developmental series of  
315 different vertebrate taxa, we present a new interpretation of some lungs previously  
316 considered as paired and, therefore, a new definition of paired lungs. Based on our results,  
317 true paired lungs are stated when bilateral lung buds arise simultaneously and are both  
318 connected directly to the foregut, as observed in the salamander (Fig. 7).

319 The sister group to all other living actinopterygian (polypterids) and all living  
320 sarcopterygian fishes have a clear unpaired lung in early developmental stages that can be  
321 developed in later stages either in a unilobed or a secondarily multilobed lung (Fig. 7), and  
322 not in a true paired lung. *Polypterus senegalus* and the lungfish *L. paradoxa* possess  
323 secondary multilobed structure from the larval stage onward since the lung is derived from

324 a unilateral connection to the foregut. The presence of this secondary multilobed  
325 morphology is an advantage for the obligatory air-breathing behavior of these taxa, raising  
326 the respiratory compliance. In the teleost *Batrachomoeus trispinosus*, the non-respiratory  
327 gas bladder is also described as paired (Rice and Bass, 2009), although it is certainly a  
328 secondary condition.

329 The most parsimonious scenario inferred from our data mapped on the phylogenetic  
330 framework (Fig. 7) is that the vertebrate lung was unpaired at the evolutionary origin.  
331 Since soft tissue are rarely preserved in fossils, living lunged osteichthyans are key taxa  
332 for the understanding of how evolutionary constraints shaped breathing adaptations on  
333 land. Our study revealed that the ancestral condition of the lung is a median unpaired  
334 organ (Fig. 7), thereby being inconsistent with the scenario that the lung evolved through a  
335 modification of the posteriormost pharyngeal pouch assumed to be present in primitive  
336 taxa (Kastschenko, 1887; Goodrich, 1931). Consequently, the evolutionary origin of the  
337 lung was likely independent of the pharyngeal pouch at the morphological level.

338 From this evolutionary point of view, we complement lung definition as an  
339 unpaired or paired respiratory organ, or its vestigial form, that develops and are ventrally  
340 connected to the foregut. Some criteria previously used for discriminating lungs from gas  
341 bladders are no longer useful, including paired/unpaired organization, position ventral to  
342 the alimentary tract (Marcus, 1937; Funk, Lencer and McCune, 2020; Lambertz and Perry,  
343 2015; Graham, 1997), as well as its function. The dorsal position of the majority of  
344 osteichthyans lungs described here may be related to its dual and secondary functionality  
345 of respiration and buoyancy control (Thomson, 1968). Actually, the only morphological  
346 characteristic that can be used to distinguish lungs and gas bladders is the ventral and  
347 dorsal origins from the foregut, respectively (Funk, Lencer and McCune, 2020; Cass,  
348 Servetnick and McCune, 2013). This phenotypic differentiation into true paired lungs in

349 tetrapods may be related to differential gene expressions (Funk, Lencer and McCune,  
350 2020; Bi et al., 2021). Nevertheless, at the developmental genetic level, the possibility of  
351 co-options of gene regulatory networks of the pharyngeal pouch morphogenesis cannot be  
352 excluded, as both the lung bud and pharyngeal pouch develop through the invagination of  
353 the foregut endoderm. Our results open the door for future molecular analyses to trace  
354 possible regulatory elements for the evolutionary transition from unpaired lungs to true  
355 paired lungs in tetrapods.

356           According to morphological evidence presented here, bifurcation morphogenesis  
357 into true paired lungs was not developed yet in osteichthyan fish ancestors. The bilaterally  
358 paired nature of the lung evolved only in the lineage towards the tetrapods, as a  
359 synapomorphy of this clade (Fig. 7). This morphological modification brought about  
360 improvement of the efficiency in oxygen-uptake from the air, as the paired lungs having  
361 parallel air flows exchange the air more quickly than the unpaired lung having only single  
362 air flow does. This innovation led to the elevation of metabolic rate that was required for  
363 the sustained body support against the gravity. Paired lungs may have been present also in  
364 early tetrapods and were probably essential to raise lung surface area and volume capacity  
365 during the evolution of vertebrate respiratory system and the air-breathing intensification  
366 at the water to land transition.

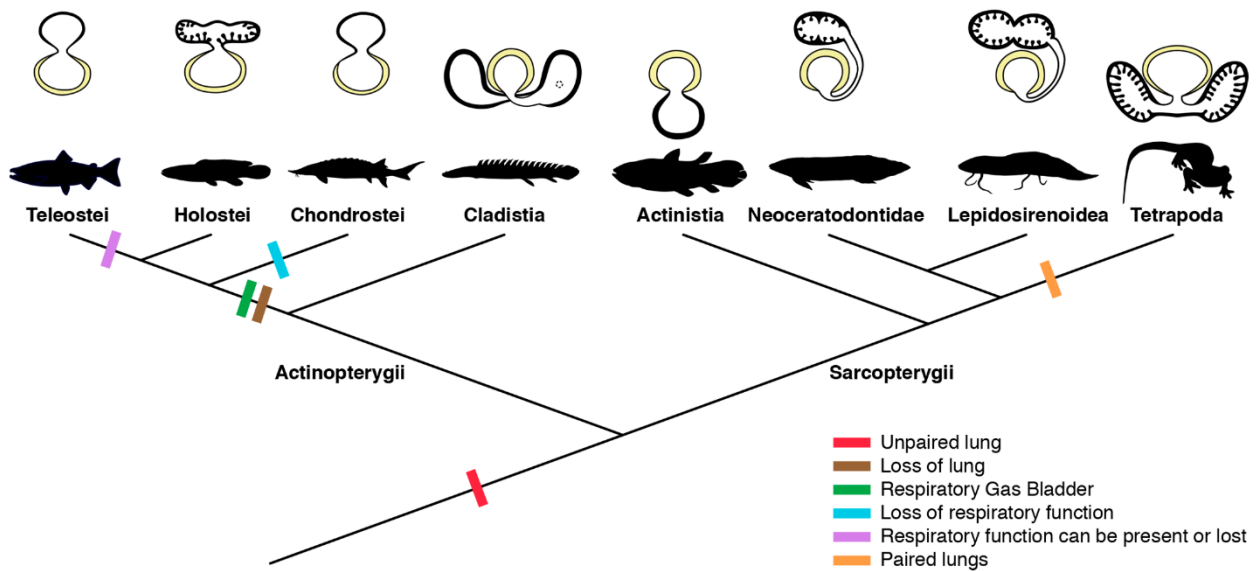

**Fig. 7. Schematic figure reconstructing the evolutionary history of vertebrate lungs.**

All living actinopterygian and sarcopterygian fishes have unpaired lungs. True paired lungs are a synapomorphy of tetrapods. Dashed circle in Cladistia lung pointing to the secondary and independent opening to a left sac, at the lung level. Modified from Liem, 1988. This figure was made with free silhouettes from PhyloPic.

## Materials and Methods

### Specimens information

All specimens used in this work are permanently housed in collections of public institutions. No specimens were collected alive in the field for this work. *Polypterus senegalus* specimens were originally obtained for the study on the molecular developmental in polypterids (Tatsumi et al., 2016). Nine specimens here studied are: six late embryos (free embryonic phase or postembryos) of 8.0 mm TL (PS-001-01) and histological thin-section of another specimen of 8.0 mm TL (PSS-No1), 8.5 mm TL (PS-001-02), 9.1 mm TL (PSS-No2) and 9.3 mm TL (two specimens, PS-001-03); four larva of 12 mm TL (two specimens, PS-001-04), 15.5 mm TL (PSS-No3) and 18.0 mm TL (PSS-No4); and three juveniles of 20 mm TL (PS-001-05), 23 mm TL (PS-001-06), and 45 mm TL (PS-001-07). We indicate the developmental stages (embryo, larvae,

388 juveniles, and adults) following Bartsch, Gemballa and Piotrowski (1997). Specimens  
389 and histological material are housed at the Department of Anatomy of the Jikei  
390 University School of Medicine (Tokyo, Japan).

391 Four specimens of *Lepidosiren paradoxa* here studied are from the collections of  
392 the Universidade do Estado do Rio de Janeiro and were collected legally in 2008, with  
393 the permission number 11471-1. The specimens are registered under the acronym UERJ-  
394 PN: UERJ-PN 550 is a larva of 46 mm TL; UERJ-PN 262 is a juvenile of 68 mm TL;  
395 UERJ-PN 238 is juvenile of 222.1 mm TL; and PC02 is an adult of 400 mm TL. We  
396 follow Kerr (1900) for the developmental staging of *Lepidosiren*.

397 Specimens of *Neoceratodus forsteri* were collected legally from Department of  
398 Biological Sciences, Macquarie University, Sydney, Australia, and transported with the  
399 permission of CITES (Certificate No. 2009-AU-564836). The developmental series  
400 comprises fourteen specimens. Sizes are: an early embryo of 13.5 mm TL (IMU-RU-SI-  
401 0013); 11 larvae of 16 mm TL (IMU-RU-SI-0017), 17 mm TL (IMU-RU-SI-0019 and  
402 IMU-RU-SI-0022], 17.5 mm TL (IMU-RU-SI-0037), 19 mm TL (IMU-RU-SI-0038),  
403 20.5 mm TL (IMU-RU-SI-0039), 24 mm TL (IMU-RU-SI-0040), 25.5 mm TL (IMU-  
404 RU-SI-0041), 26.5 mm TL (IMU-RU-SI-0042), 30 mm TL (IMU-RU-SI-0043), and 50  
405 mm TL (IMU-RU-SI-0045); a juvenile of 70 mm TL (IMU-RU-SI-0048); and an adult  
406 specimen of 200 mm TL (KPM-NI 11384). For the developmental identification  
407 (embryos, hatchlings/larvae, juveniles, and adults) we follow Kemp (1982, 2011) and  
408 Ziermann et al. (2018).

409 Six *Salamandra salamandra* specimens were obtained on loan at the amphibian  
410 collection of the Muséum national d'Histoire naturelle (Paris, France). The three  
411 developmental stages (as described at the MNHN collection) are: two early larvae  
412 MNHN 1978.636 (1) of 35.5 mm TL and MNHN 1978.636 (2) of 42.8 mm TL; larva

413 MNHN 1985.9039 of 49.6 mm; larva in metamorphosis MNHN 1978.542 of 54.44 mm  
414 TL; small juvenile MNHN 1988.7177 of 50 mm TL; juvenile MNHN 1962.1004 of  
415 81.85 mm TL.

416 Institutional abbreviations: IMU-RU-SI, Iwate Medical University, Ryozi Ura  
417 Collection, Japan; PS, *Polypterus senegalus*; PSS, *Polypterus senegalus* sections; KPM-  
418 NI, Kanagawa Prefectural Museum Natural History, Odawara, Japan; MNHN, Muséum  
419 national d'Histoire naturelle, Paris, France; UERJ-PN, Universidade do Estado do Rio de  
420 Janeiro, Peixes Neotropicaís.

421

### 422 **X-ray tomography**

423 Due to the extremely small size of the embryos and larvae, and to the weak  
424 density difference between soft tissues of the abdominal cavity, propagation phase-  
425 contrast microtomography was the unique way to study their anatomy and histology at  
426 micrometer scale. Phase-contrast microtomography being only achieved at synchrotron  
427 sources, we accessed the anatomy of these rare and tiny samples at the Synchrotron  
428 SOLEIL and Synchrotron SPring-8. The high brightness of the synchrotrons was  
429 essential for our material and enabled the collection high resolution scans in short  
430 timescales.

431 Specimens of *P. senegalus*, *L. paradoxa* and *S. salamandra* were imaged at the  
432 PSICHÉ beamline of the SOLEIL Synchrotron (Saint-Aubin, France) while *N. forsteri*  
433 specimens were scanned at SPring-8 Synchrotron. The specimens were scanned isolated  
434 in a plastic tube filled with Phosphate-buffered saline (PBS) for *P. senegalus* and *N.*  
435 *forsteri*, ethanol for *L. paradoxa* and formaldehyde for *S. salamandra*. They were  
436 immobilized in vertical position using gauze pads, and/or sank inside the tip of a plastic

437 pipette in the case of tiny individuals, in order to benefit as much possible from the  
438 available field of view and thus achieve the highest possible resolution.

439 At SOLEIL Synchrotron, imaging was performed using a monochromatic beam  
440 with an energy of 25 keV. A series of acquisitions with vertical movement of the sample  
441 were recorded to extend vertically the field of view and image the entire (or most of the)  
442 individual. Two distinct setups were used to accommodate the different sizes of the  
443 individuals (size variations occurring both between developmental stages and taxa). (1)  
444 Small individuals were scanned using a field of view of  $2.6 \times 2.6 \text{ mm}^2$  (5x  
445 magnification) resulting in a projected pixel size of  $1.3 \text{ }\mu\text{m}$ , and a propagation distance of  
446 148 mm. (2) Larger individuals were scanned using a field of view of  $\sim 12.6 \times 3.3 \text{ mm}^2$   
447 (1x magnification) resulting in a projected pixel size of  $6.17 \text{ }\mu\text{m}$ , and a propagation  
448 distance of 500 mm. For individuals slightly wider than these field of views, the latter  
449 were extended horizontally by positioning the rotation axis off-centre and acquiring data  
450 over a  $360^\circ$  rotation of the sample. The volumes were reconstructed from the (vertically)  
451 combined radiographs using PyHST2 software (Mirone et al., 2014), with a Paganin  
452 phase retrieval algorithm (Paganin et al., 2002). The huge resulting volumes (from 70 Gb  
453 to 1.2 Tb) were reduced (crop, rescale 8-bit, binning) to facilitate 3D data processing.

454 Specimens of *Neoceratodus forsteri* (from 13.5 to 70 mm TL) were imaged at  
455 the SPring-8 Synchrotron, beamline 20B2. For specimens from 13.5 mm TL to 30 mm  
456 TL, a beam energy of 15 keV was used with a double bounce Si (111) monochromator.  
457 Data were obtained at three different resolutions, and correspondingly used three  
458 combinations of two lenses and fluorescent material, as follows,  $2.75 \text{ }\mu\text{m/voxel}$ ; 1st-  
459 stage lens: "beam monitor 2" f35 mm; 2nd-stage lens: Nikon 85 mm lens; GADOX  
460 thickness:  $15 \text{ }\mu\text{m}$   $4.47 \text{ }\mu\text{m/voxel}$ ; 1st-stage lens: "beam monitor 2" f35 mm; 2nd-stage  
461 lens: Nikon 50 mm lens; GADOX thickness:  $15 \text{ }\mu\text{m}$   $12.56 \text{ }\mu\text{m/voxel}$ ; 1st-stage lens:



462 "beam monitor 5" f200 mm; 2nd-stage lens: Nikon 105 mm lens; GADOX thickness: 25  
463  $\mu\text{m}$ .

464 Datasets were acquired at propagation distances of 2.75  $\mu\text{m}/\text{voxel}$ , 4.47  
465  $\mu\text{m}/\text{voxel}$ : 600 mm; 12.56  $\mu\text{m}/\text{voxel}$ : 3 m and three different exposure times of 70 ms,  
466 150 ms, and 200 ms per projection. Field of view were: pixel size x 2048 (2.75 x 2048 =  
467 5632  $\mu\text{m}$ ; 4.47 x 2048 = 9154.56  $\mu\text{m}$ ; 12.56 x 2048 = 25722.88  $\mu\text{m}$ ) A total of 1800  
468 projections were recorded per scan as the sample was rotated through 180°. A high-  
469 resolution computerized axial tomography scanning (CAT scan) was performed for the  
470 adult specimen of *Neoceratodus* (KPM-NI 11384) of 200 mm TL at the National  
471 Museum of Nature and Science (Tokyo, Japan) using the following scanning parameters:  
472 effective energy 189 kV, current 200 mA, voxel size 9.765  $\mu\text{m}$  and 1000 views (slice  
473 width 0.1 mm).

474

## 475 **Segmentation and three-dimensional rendering**

476 Segmentation and 3D rendering were performed using the software MIMICS Innovation  
477 Suite 20.0 (Materialise) at the Laboratório de Ictiologia Tempo e Espaço of the  
478 Universidade do Estado do Rio de Janeiro.

479

480

## 481 **References**

- 482 1. Amemiya, C. T.; Alföldi, J.; Lee, A. P.; Fan, S.; Philippe, H.; MacCallum, I.,...,  
483 Lindblad-Toh, K. The African coelacanth genome provides insights into tetrapod  
484 evolution. *Nature* **496**, 311-316 (2013).
- 485 2. Bartsch, P.; Gemballa, S.; Piotrowski, T. The Embryonic and Larval Development  
486 of *Polypterus senegalus* Cuvier, 1829: its Staging with Reference to External and

- 487 Skeletal Features, Behaviour and Locomotory Habits. *Acta Zool.* **78**, 309-328  
488 (1997).
- 489 3. Bi, X.; Wang, K.; Yang, L.; Pan, H.; Jiang, H.; Wei, Q...., Zhang, G. Tracing the  
490 genetic footprints of vertebrate landing in non-teleost ray-finned fishes. *Cell* **184**,  
491 1377-1391 (2021).
- 492 4. Brito, P. M.; Meunier, F. J.; Clément, G.; Geffard-Kuriyama, D. The histological  
493 structure of the calcified lung of the fossil coelacanth *Axelrodichthys araripensis*  
494 (Actinistia: Mawsoniidae). *Palaeontology* **53**, 1281-1290 (2010).
- 495 5. Cass, A. N.; Servetnick, M. D.; McCune, A. R. Expression of a lung developmental  
496 cassette in the adult and developing zebrafish swimbladder. *Evol Dev* **15**, 119-132  
497 (2013).
- 498 6. Cupello, C.; Brito, P. M.; Herbin, M.; Meunier, F. J.; Janvier, P.; Dutel, H.; Clément,  
499 G. Allometric growth in the extant coelacanth lung during ontogenetic development.  
500 *Nat. Commun.* **6**, 8222 (2015).
- 501 7. Cupello, C.; Meunier, F. J.; Herbin, M.; Clément, G.; Brito, P. M. Lung anatomy  
502 and histology of the extant coelacanth shed light on the loss of air-breathing during  
503 deep-water adaptation in actinistians. *Roy. Soc. Open Sci.* **4**, 161030 (2017a).
- 504 8. Cupello, C.; Meunier, F. J.; Herbin, M.; Janvier, P.; Clément, G.; Brito, P. M. The  
505 homology and function of the lung plates in extant and fossil coelacanths. *Sci.*  
506 *Rep.* **7**, 1-8 (2017b)
- 507 9. Cupello, C.; Clément, G.; Brito, P. M. in *Evolution and Development of Fishes*  
508 (Cambridge University Press, Cambridge, 2019), pp. 252-262.
- 509 10. Funk, E.; Lencer, E.; McCune, A. Dorsoventral inversion of the air-filled organ  
510 (lungs, gas bladder) in vertebrates: RNAsequencing of laser capture microdissected  
511 embryonic tissue. *J. Exp. Zool. Part. B.* **334**, 325-338 (2020).

- 512 11. Geoffrey Saint Hilaire, E. Histoire naturelle et description anatomique d'un nouveau  
513 genre de poisson du Nil, nommé Polyptère. *Paris Mus. Nat. Hist. Ann.* **1**, 57-68  
514 (1802).
- 515 12. Goniakowska-Witalińska, L. Ultrastructural and morphometric study of the lung of  
516 the European salamander, *Salamandra salamandra* L. *Cell and Tissue Res.* **191**, 343-  
517 356 (1978).
- 518 13. Goniakowska-Witalińska, L. Development of the larval lung of *Salamandra*  
519 *salamandra* L. *Anat. Embryol.* **164**, 113-137 (1982).
- 520 14. Goodrich, E. S. Studies on the Structure and Development of Vertebrates. *J. N.*  
521 *Ment. Dis.* **74**, 678 (1931).
- 522 15. Goujet, D. "Lungs" in placoderms, a persistent palaeobiological myth related to  
523 environmental preconceived interpretations. *C. R. Palevol.* **10**, 323-329 (2011).
- 524 16. Graham, J. B. *Air breathing fishes: evolution, diversity and adaptation* (Academic  
525 Press, 1997).
- 526 17. Greil, A. Entwicklungsgeschichte des Kopfes und des Blutgefäßsystems von  
527 *Ceratodus forsteri*. II. Die epigenetischen Erwerbungen während der Stadien 39-48.  
528 *Denkschr. Med. Naturwiss. Ges. Jena.* **4**, 935-1492 (1913).
- 529 18. Grigg, G. C. Studies on the Queensland lungfish, *Neoceratodus forsteri* (Krefft). 1.  
530 Anatomy, histology, and functioning of the lung. *Aust. J. Zool.* **13**, 243-253 (1965).
- 531 19. Icardo, J. M.; Colvee, E.; Kuciel, M.; Lauriano, E. R.; Zaccone, G. The lungs of  
532 *Polypterus senegalus* and *Erpetoichthys calabaricus*: insights into the structure and  
533 functional distribution of the pulmonary epithelial cells. *J. Morphol.* **278**, 1321-1332  
534 (2017).
- 535 20. Kardong, K. V. The respiratory system, Vertebrates: Comparative anatomy,  
536 function, evolution, 413-450 (2015).

- 537 21. Kastschenko, N. Das Schlundspaltengebiet des Hühnchens. *Arch. Anat. Phys. Anat.*  
538 *Abt.* 258-300 (1887).
- 539 22. Kemp, A. The embryological development of the Queensland lungfish,  
540 *Neoceratodus forsteri* (Kreffft). *Mem. Qd. Mus.* **20**: 553-97 (1982).
- 541 23. Kemp, A. The biology of the Australian lungfish, *Neoceratodus forsteri* (Kreffft  
542 1870). *J. Morphol.* **190**, 181-198 (1986).
- 543 24. Kemp, A. Comparison of embryological development in the threatened Australian  
544 lungfish *Neoceratodus forsteri* from two sites in a Queensland river  
545 system. *Endanger Species Res.* **15**, 87-101 (2011).
- 546 25. Kerr, S. G. V. The external features the development of *Lepidosiren paradoxa*,  
547 Fitz. *Philos. Tr. R. Soc. Lon. B*, **192**, 299-330 (1900).
- 548 26. Kuratani, S.; Tanaka, S. Peripheral development of the avian vagus nerve with  
549 special reference to the morphological innervation of heart and lung. *Anat. Embryol.*  
550 **182**, 435-445 (1990).
- 551 27. Lambertz, M.; Grommes, K.; Kohlsdorf, T.; Perry, S. F. Lungs of the first amniotes:  
552 why simple if they can be complex? *Biol. Lett.* **11**, 20140848 (2015).
- 553 28. Lambertz, M.; Perry, S. F. in *Phylogeny, Anatomy and Physiology of Ancient Fishes*,  
554 (CRC Press, Florida, 2015), pp. 201-211.
- 555 29. Liem, K. Form and function of lungs: the evolution of air breathing mechanisms.  
556 *Amer. Zool.* **28**, 739-759 (1988).
- 557 30. Marcus, H. in: *Lunge, Handbuch der vergleichenden Anatomie der Wirbeltiere*  
558 (Urban and Schwarzenberg, Berlin, 1937).
- 559 31. Marshall Flint, J. The development of the lungs. *Am. J. Anat.* **6**, 1-137 (1906).
- 560 32. Mirone, A.; Gouillart, E.; Brun, E.; Tafforeau, P.; Kieffer, J. The PyHST2 hybrid  
561 distributed code for high speed tomographic reconstruction with iterative

- 562 reconstruction and a priori knowledge capabilities. *Nucl. Instrum. Methods* **324**, 41-  
563 48 (2014).
- 564 33. Neumayer, L. Die Entwicklung des Darmkanales, von Lunge, Leber, Milz und  
565 Pankreas bei *Ceratodus*. *Forsteri. Zool. Forsch. reisen* **1**, 379-422 (1904).
- 566 34. Neumayer, L. Die Entwicklung des Darms von *Acipenser*. *Acta Zool.* **39**, 1-151  
567 (1930)
- 568 35. Paganin, D.; Mayo, S. C.; Gureyev, T. E.; Miller, P. R.; Wilkins, S. W.  
569 Simultaneous phase and amplitude extraction from a single defocused image of a  
570 homogeneous object. *J. Microsc.* **206**, 33-40 (2002).
- 571 36. Perry, S. F.; Wilson, R. J. A.; Straus, C.; Harris, M. B.; Remmers, J. E. Which came  
572 first, the lung or the breath? *Comp. Biochem. and Physiol.* **129**, 37-47 (2001).
- 573 37. Pierce, S. E.; Lamas, L. P.; Pelligand, L.; Schilling, N.; Hutchinson, J. R. Patterns of  
574 limb and epaxial muscle activity during walking in the fire salamander, *Salamandra*  
575 *salamandra*. *Integr. Org. Biol.* **2**, obaa015 (2020).
- 576 38. Rice, A. N.; Bass, A. H. Novel vocal repertoire and paired swimbladders of the  
577 three-spined toadfish, *Batrachomoeus trispinosus*: insights into the diversity of the  
578 *Batrachoididae*. *J. Exp. Biol.* 1377-1391 (2009).
- 579 39. Spencer, W. B. Contributions to Our Knowledge of *Ceratodus*: The Blood Vessels.  
580 *Linnean Soc of New South Wales* (1893).
- 581 40. Tatsumi, N.; Kobayashi, R.; Yano, T.; Noda, M.; Fujimura, K.; Okada, N.; Okabe,  
582 M. Molecular developmental mechanism in polypterid fish provides insight into the  
583 origin of vertebrate lungs. *Sci. Rep.* **6**, 30580 (2016).
- 584 41. Thomson, K. S. Lung ventilation in dipnoan fishes. *Pea. Mus. Nat. Hist.* **122**, 1-6  
585 (1968).

- 586 42. Tissier, J.; Rage, J-C.; Laurin, M. Exceptional soft tissues preservation in a  
587 mummified frog-eating Eocene salamander. *PeerJ* **5**: e3861 (2017).
- 588 43. Wassnetzov, W. Über die Morphologie der Schwimmblase. *Zool. Jahrb. Allg. Zool.*  
589 **56**, 1-36 (1932).
- 590 44. Ziermann, J. M.; Clement, A. M.; Ericsson, R.; Olsson, L. Cephalic muscle  
591 development in the Australian lungfish, *Neoceratodus forsteri*. *J. Morphol.* **279**, 494-  
592 516 (2018).

## 593 594 595 **Acknowledgments**

596 We thank J. Joss (Macquarie University) for providing *Neoceratodus* embryos. We  
597 are grateful to Dr H. Seno (curator of the Ichthyology Collection of the Kanagawa  
598 Prefectural Museum of Natural History) for the loan of *Neoceratodus* specimen KPM-NI  
599 11384.

## 600 601 602 **Funding:**

603 Coordenação de Aperfeiçoamento de Pessoal de Nível Superior—Brasil (CAPES)—grant  
604 Finance Code 001 (Programa Nacional de Pós Doutorado-PNPD) (CC)  
605 Programa de Apoio à Docência (PAPD) grant E-26/007/10661/2019)—Universidade do  
606 Estado do Rio de Janeiro (CC)  
607 Interdisciplinary Collaborative Research Program of the Atmosphere and Ocean Research  
608 Institute, the University of Tokyo JP (CC, TS)  
609 Prociência fellowship CNPq grant 310101/2017-4 (PMB)  
610 FAPERJ grant E-26/ 202.890/2018 (PMB)

611  
612  
613  
614  
615  
616  
617  
618  
619  
620  
621  
622  
623  
624  
625  
626  
627  
628  
629  
630  
631  
632  
633  
634  
635  
636

**Author contributions:**

Examples:

Conceptualization: CC, YY, PMB

Synchrotron acquisitions: CC, TH, YY, PG, SI, AK, MH, KU, PMB

CT scan acquisitions: RM

Computerized microtomography rendering: CC, NT

Histological thin sections preparation: NT, MO

Specimens dissection: CC, NT, SI

Tomographic setups and data processing: PG, RM, AK, MH, KU

Figures: CC, PG

Data interpretation and Writing—original draft: CC, TH, NT, YY, PG, MO, PMB

Writing—final writing & manuscript approval: CC, TH, NT, YY, PG, SI, RM, TS,

AK, MH, KU, MO, PMB

**Competing interests:** All authors declare no competing interests.

**Data and materials availability:** All data are available in the main text or the supplementary materials.

**Supplementary Materials**

637  
638  
639

Supplementary information is available for this paper at <https://doi.org/>.



## Supplementary Information for

### **Lung evolution in vertebrates and the water-to-land transition**

Camila Cupello,<sup>1\*</sup> Tatsuya Hirasawa,<sup>2</sup> Norifumi Tatsumi,<sup>3</sup> Yoshitaka Yabumoto,<sup>4</sup> Pierre Gueriau,<sup>5,6</sup> Sumio Isogai,<sup>7</sup> Ryoko Matsumoto,<sup>8</sup> Toshiro Saruwatari,<sup>9,10</sup> Andrew King,<sup>11</sup> Masato Hoshino,<sup>12</sup> Kentaro Uesugi,<sup>12</sup> Masataka Okabe,<sup>3</sup> Paulo M. Brito<sup>1\*</sup>

\*Corresponding authors. Email: [camila.dc@gmail.com](mailto:camila.dc@gmail.com); [pbritopaleo@yahoo.com.br](mailto:pbritopaleo@yahoo.com.br)

**This PDF file includes:**

Figs. S1 to S5

**Fig. S1. Sections of synchrotron X-ray microtomography of a juvenile of *Polypterus senegalus* (23 mm TL). (A) Unpaired lung origin. (B) Right sac arising from the foregut. (C) Left sac arising from an independent and lateral connection to the right sac. (D) Right and left sacs. Yellow, foregut; red, lung. Orange arrow, opened connection between foregut and lung. Fg, foregut; ls, left sac; rs, right sac. Scale bars, 0.5 mm (A-D).**

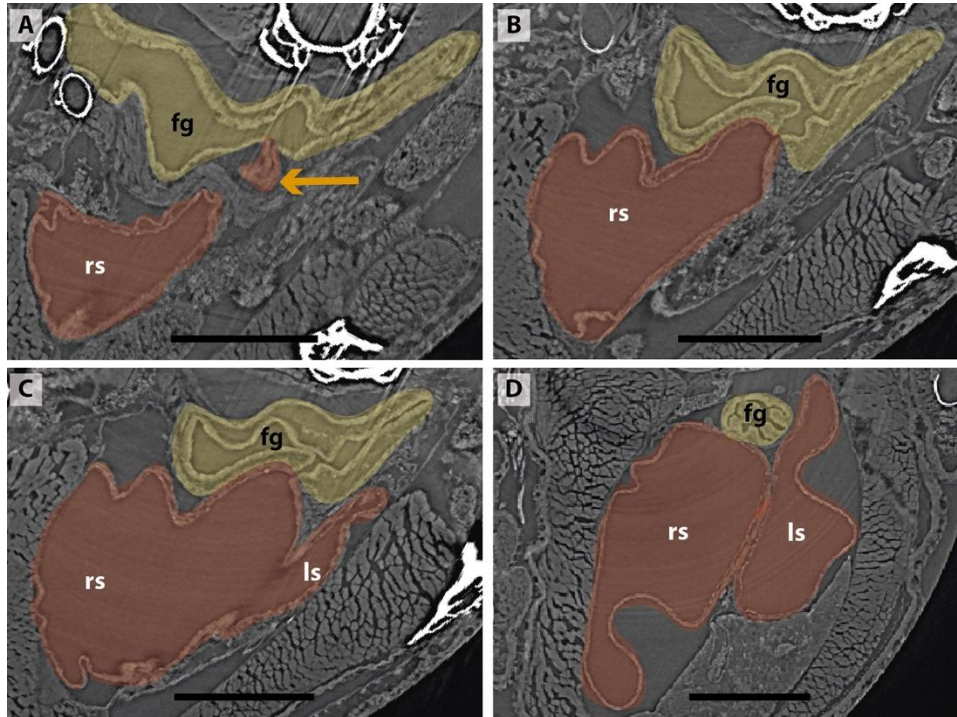

**Fig. S2. Three-dimensional reconstructions of the pulmonary complex of *Polypterus senegalus*.** (A) Virtual section of the juvenile (45 mm TL) in anterior view, evidencing the oesophagus and the lung in 3D. (B) Isolated right lung of the juvenile in lateral view, evidencing the independent and secondary connection of the left sac to the right one by a lateral opening. Yellow, foregut including the stomach; red, right sac; blue, left sac, dashed line, independent and secondary connection of the left sac to the right one.

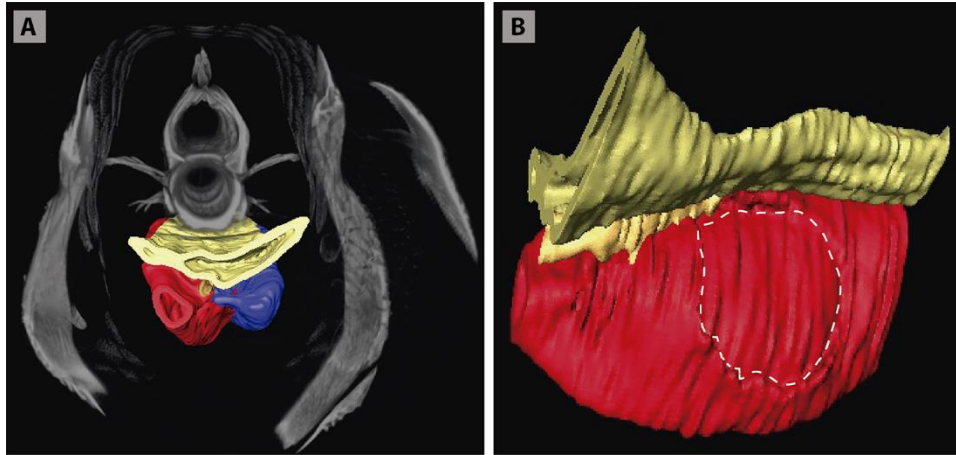

**Fig. S3. Sections of synchrotron X-ray microtomography of a larva of *Neoceratodus forsteri* (19 mm TL). (A) Unpaired lung origin. (B) Unique sac arising from the foregut. (C, D) Unique sac developing. Yellow, foregut; red, lung. Orange arrow, opened connection between foregut and lung. fg, foregut; us, unique sac. Scale bars, 0.5 mm (A-D).**

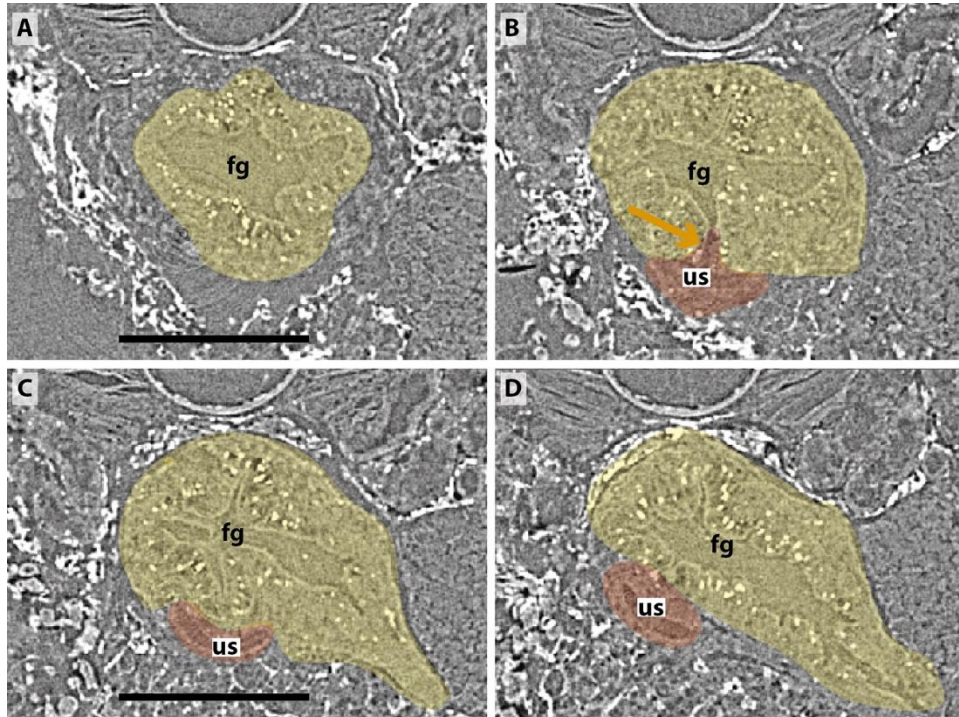

**Fig. S4. Sections of synchrotron X-ray microtomography of a juvenile of *Lepidosiren paradoxa* (68 mm TL). (A) Unpaired lung origin. (B) Right sac arising from the foregut. (C) Left sac arising from an independent and lateral connection to the right sac. (D) Right and left sacs. Yellow, foregut; red, lung. Orange arrow, opened connection between foregut and lung. fg, foregut; ls, left sac; rs, right sac. Scale bars, 0.5 mm (A-D).**

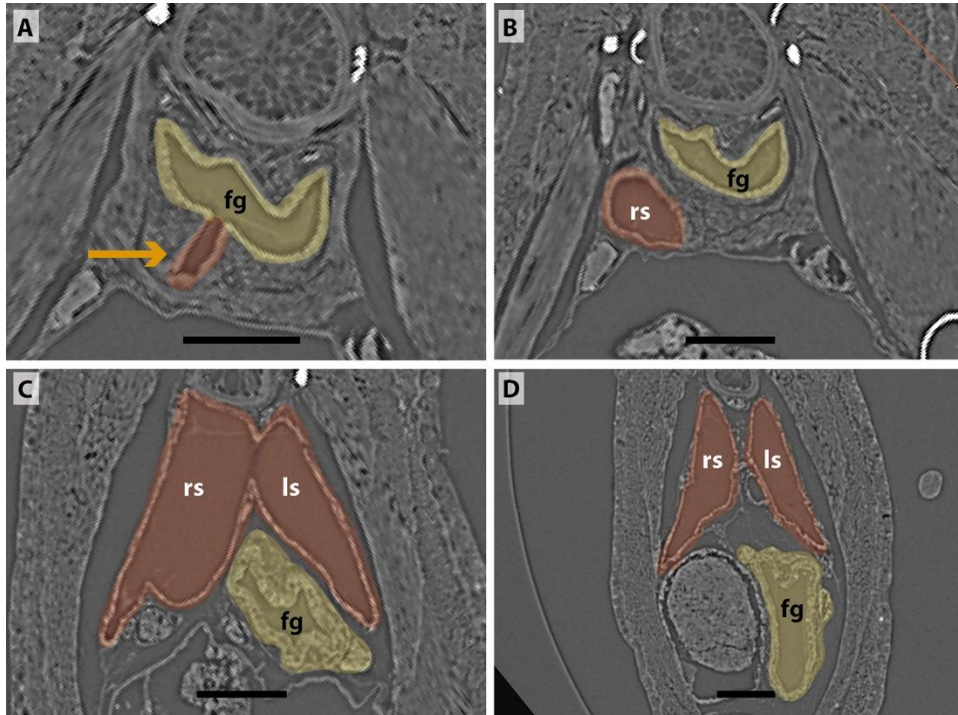

**Fig. S5. Dissection of the lung of an adult *Lepidosiren paradoxa* (400 mm TL).** Red arrow, lung. Black arrow, ventral insertion of the right sac. ls, left sac; rs, right sac. Scale bars, 50 mm (A, B); 10 mm (C).

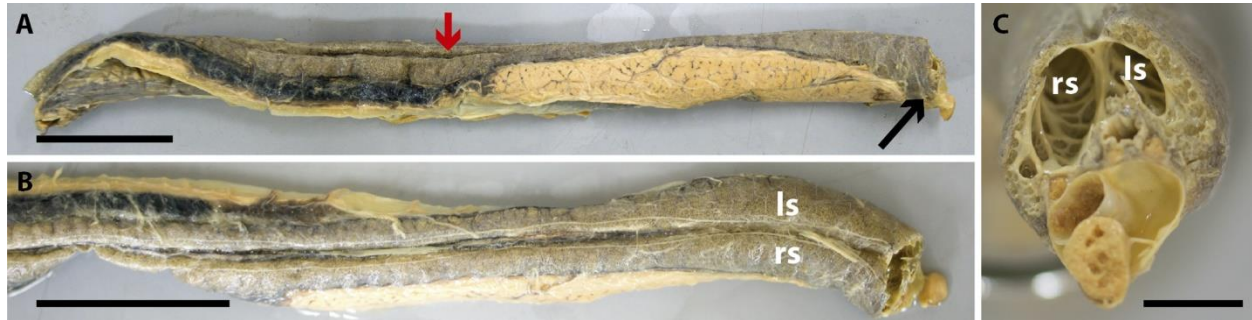

**Fig. S6. Sections of synchrotron X-ray microtomography of a larva of *Salamandra salamandra* (42.8 mm TL). (A, B) Trachea arising. (C, D) First order bronchioles. (E) Right and left lungs arising simultaneously and symmetrically. Yellow, foregut; red, lung. Orange arrow, opened connection from the foregut. br, bronchiole; fg, foregut; ll, left lung; rl, right lung; tr, trachea. Scale bars, 0.5 mm (A-D).**

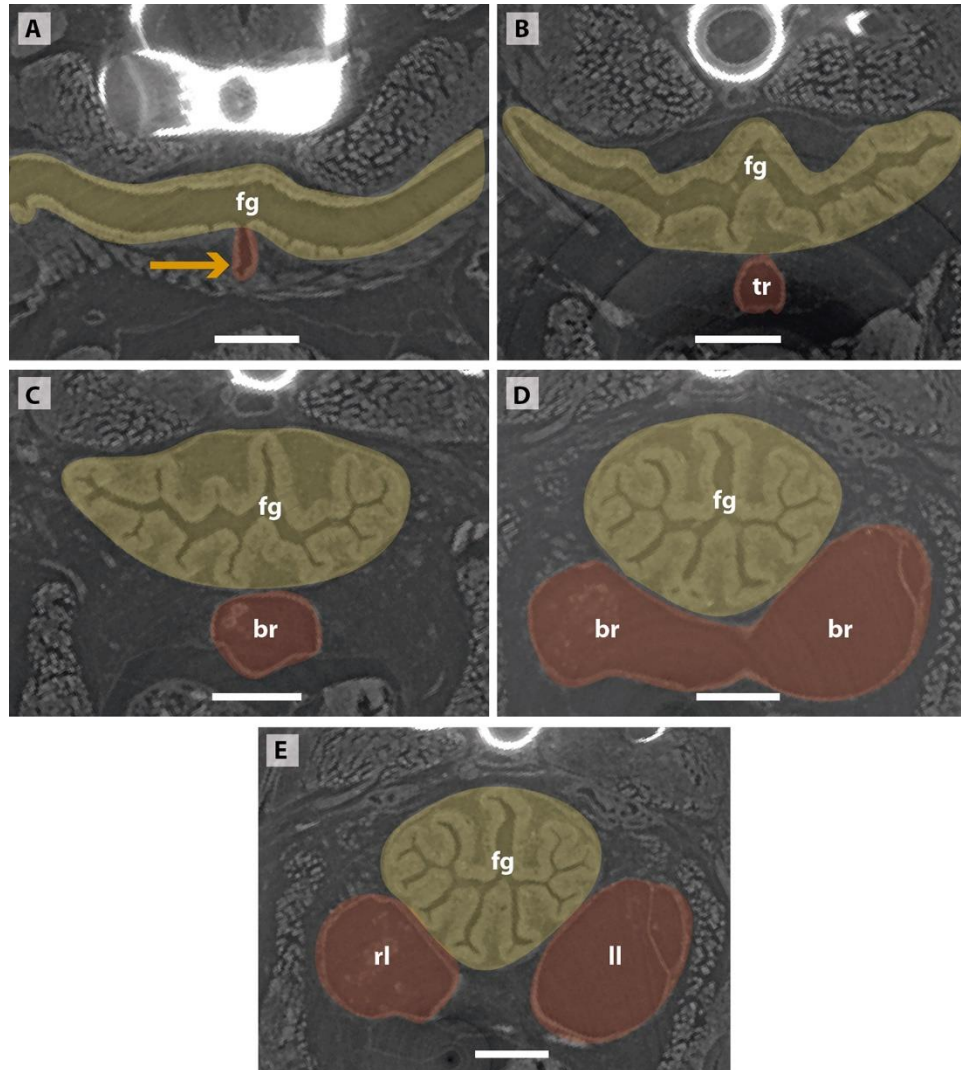

Source: http://biorxiv.org/content/10.1101/2022.02.14.480340v1.full.pdf
